# Supplementary material for: Endophytic Biostimulants for Smart Agriculture: Burkholderia seminalis 869T2 Benefits Heading Leafy Vegetables In-Field Management in Taiwan
Source: MDPI journal article supplement (doi:10.3390/agronomy13040967), 2023-03-24
Supplement: s1 [file s1]

## Agronomy Supporting Information

Article title: Endophytic biostimulants for smart agriculture: *Burkholderia seminalis* 869T2 benefits heading leafy vegetables in-field management in Taiwan

Authors: Shih-Hsun Walter Hung, Tsai-Ching Huang, Yu-Chih Lai, I-Chen Wu, Chia-Ho Liu, Yuh-Feng Huarng, Hau-Hsuan Hwang, En-Pei Isabel Chiang, Chih-Horng Kuo and Chieh-Chen Huang

The following Supporting Information is available for this article:

**Figure S1.** Endophytic biostimulants-treated lettuce phenotypes in the field.

**Table S1.** The primer pairs used for artificial symbiosis availability checks in this work.

**Table S2.** Different testing conditions for the best fermentation medium (BFM) evaluation.

**Table S3.** Testing combinations for the best fermentation medium (BFM).

**Table S4.** Nutrient element analysis of in-field lettuce treated with a semilarge volume of fermenting endophytic biostimulants.

**Table S5.** Nutrient element analysis of in-field lettuce treated with a large volume of fermenting endophytic biostimulants.

**Figure S1.** Endophytic biostimulants-treated lettuce phenotypes in the field.

Phenotypes of harvested heads: (a) fresh weight (FW), (b) total soluble sugar (TSS) and (c) starch contents per sample dry weight (DW), (d) hardness, and (e) circumference length (HPD, polar diameter; HED, equatorial diameter); lengths are shown as the mean  $\pm$  SEM.  $n=3-4$ . Different letters indicate statistically significant differences,  $p<0.05$ .

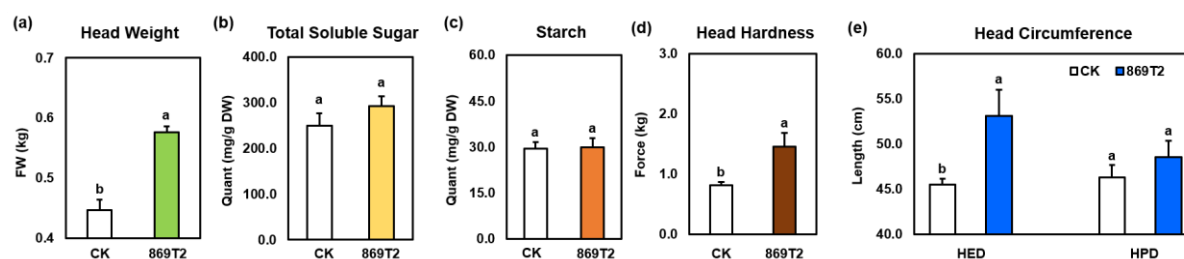

**Table S1.** The primer pairs used for artificial symbiosis availability checks in this work.

| Gene product                   | Primer pairs | Sequence (5' to 3')       | Reference                  |
|--------------------------------|--------------|---------------------------|----------------------------|
| 16S rRNA                       | E8F          | AGAGTTTGATCATGGCTCAG      | Baker <i>et al.</i> , 2003 |
|                                | U1510R       | CGGTTACCTTGTTACGACTT      |                            |
| Pyrrolnitrin                   | BSPYT_F      | TCGATCCGGAAGGCGGGCGGCCTCC | This work                  |
|                                | BSPYT_R      | CGGTCGACCCAGCCGCGGTAGAAC  |                            |
| Pyrroloquinoline quinone (PQQ) | BSPQBCD_F    | ATGAAGATCAAGATACTCGGC     | This work                  |
|                                | BSPQBCD_R    | TCAGTCGAGCCAGCC           |                            |

**Table S2.** Different testing conditions for the best fermentation medium (BFM) evaluation.

| Nutrient recipes                       |         |      |                                        |         |      |
|----------------------------------------|---------|------|----------------------------------------|---------|------|
| PYGn                                   | Content | Unit | MRSn                                   | Content | Unit |
| NaHCO <sub>3</sub>                     | 0.4     | g/L  | Tween 80                               | 1       | g/L  |
| NaCl                                   | 0.08    | g/L  | Ammonium citrate                       | 2       | g/L  |
| KH <sub>2</sub> PO <sub>4</sub>        | 0.04    | g/L  | CH <sub>3</sub> COONa                  | 5       | g/L  |
| K <sub>2</sub> HPO <sub>4</sub>        | 0.04    | g/L  | K <sub>2</sub> HPO <sub>4</sub>        | 2       | g/L  |
| MgSO <sub>4</sub> ·7(H <sub>2</sub> O) | 0.0192  | g/L  | MgSO <sub>4</sub> ·7(H <sub>2</sub> O) | 0.1     | g/L  |
| CaCl <sub>2</sub>                      | 0.008   | g/L  | MnSO <sub>4</sub> ·H <sub>2</sub> O    | 0.05    | g/L  |
| FeSO <sub>4</sub> ·7(H <sub>2</sub> O) | 1.1     | mg/L |                                        |         |      |

  

| Carbon and nitrogen sources |         |      |                 |         |      |
|-----------------------------|---------|------|-----------------|---------|------|
| Carbon                      | Content | Unit | Nitrogen        | Content | Unit |
| Molasses M1                 | 40      | g/L  | Fish protein F1 | 20      | g/L  |
| Molasses M2                 | 60      | g/L  | Fish protein F2 | 40      | g/L  |

  

| Gas conditions  |             |                 |       |
|-----------------|-------------|-----------------|-------|
| Aerobic         | Ratio       | Anaerobic       | Ratio |
| O <sub>2</sub>  | same to air | O <sub>2</sub>  | 0%    |
| CO <sub>2</sub> | same to air | CO <sub>2</sub> | 100%  |

**Table S3.** Testing combinations for the best fermentation medium (BFM).

| Conditions                      | + Nutrient | C & N | Gas       | - Nutrient | C & N | Gas       |
|---------------------------------|------------|-------|-----------|------------|-------|-----------|
|                                 | PYGn       | M1    | Aerobic   | --         | M1    | Aerobic   |
|                                 | MRSn       | M2    | Anaerobic | --         | M2    | Anaerobic |
|                                 |            | F1    |           |            | F1    |           |
|                                 |            | F2    |           |            | F2    |           |
| Number of                       | 2          | 4     | 2         | --         | 4     | 2         |
| Combinations                    |            |       | 16        |            |       | 8         |
| Total testing combinations = 24 |            |       |           |            |       |           |

**Table S4.** Nutrient element analysis of in-field lettuce treated with a semilarge volume of fermenting endophytic biostimulants.

| Targeted Nutrient Elements                                                          | Detected Content (%) |               |
|-------------------------------------------------------------------------------------|----------------------|---------------|
|                                                                                     | CK                   | 869T2         |
| Total Nitrogen (N)                                                                  | 2.5±0.05             | 2.37±0.28     |
| Total Phosphorus (P)                                                                | 0.589±0.009          | 0.549±0.041   |
| Total Potassium (K)                                                                 | 4.39±0.21            | 4.62±0.12     |
| Total Calcium (Ca)                                                                  | 0.361±0.016          | 0.385±0.003   |
| Total Magnesium (Mg)                                                                | 0.157±0.005          | 0.151±0.007   |
| Total Iron (Fe)                                                                     | 0.0054±0.0011        | 0.0047±0.0032 |
| Each data point is based on two biological replicates and is shown as the mean±SEM. |                      |               |

**Table S5.** Nutrient element analysis of in-field lettuce treated with a large volume of fermenting endophytic biostimulants.

| Targeted Nutrient Elements                                                                                  | Detected Content (%) |       |       |       |
|-------------------------------------------------------------------------------------------------------------|----------------------|-------|-------|-------|
|                                                                                                             | CK                   | 250X  | 500X  | 1000X |
| Total Nitrogen (N)                                                                                          | 2.6                  | 2.3   | 2.4   | 2.1   |
| Total Phosphorus (P)                                                                                        | 0.5                  | 0.4   | 0.5   | 0.4   |
| Total Potassium (K)                                                                                         | 4.7                  | 4.6   | 4.9   | 4.2   |
| Total Calcium (Ca)                                                                                          | 0.4                  | 0.4   | 0.4   | 0.4   |
| Total Magnesium (Mg)                                                                                        | 0.2                  | 0.2   | 0.2   | 0.2   |
| Total Iron (Fe) <sup>†</sup>                                                                                | 65.2                 | 57.3  | 90.9  | 44.5  |
| Total Nitrate (NO <sub>3</sub> <sup>-</sup> )                                                               | 1.23                 | 0.529 | 0.635 | 0.657 |
| Total Sulphate (SO <sub>4</sub> <sup>2-</sup> )                                                             | 0.459                | 0.175 | 0.220 | 0.233 |
| <sup>†</sup> The total iron (Fe) content is shown in mg/kg. Each data point is based on triplicate samples. |                      |       |       |       |
